# Supplementary material
Source: Research Square preprint supplement (doi:10.21203/rs.3.rs-9275471/v1)
Supplement: Supplementary file 1 [file 54be7445fe3481779c72553c.docx]

| | |  | Table 1 General data | |  | M(P25,P75),X±S | | --- | --- | --- | --- | --- | | index | Sleep duration<6hours | Sleep duration6-8hours | Sleep duration>8hours | P value | | n | 64 | 196 | 107 |  | | Gender, n (%) |  |  |  | 0.109 | | Male | 49 (13.4%) | 122 (33.2%) | 71 (19.3%) |  | | Female | 15 (4.1%) | 74 (20.2%) | 36 (9.8%) |  | | Age（years） | 69 (56.5, 76) | 67 (59, 75) | 67 (56.5, 74.5) | 0.889 | | Height(cm) | 166 (160, 170) | 165(160,170.25) | 164 (160, 170) | 0.244 | | Weight(kg) | 70.5 (62,75.25) | 68 (60, 75) | 67 (60, 75) | 0.182 | | Smoking, n (%) |  |  |  | 0.815 | | NO | 42 (11.4%) | 139 (37.9%) | 68 (18.5%) |  | | YES,<10pieces/day | 2 (0.5%) | 6 (1.6%) | 4 (1.1%) |  | | YES,10-20pieces/day | 18 (4.9%) | 42 (11.4%) | 28 (7.6%) |  | | YES,>20pieces/day | 2 (0.5%) | 9 (2.5%) | 7 (1.9%) |  | | Drinking alcohol, n (%) |  |  |  | 0.316 | | NO | 56 (15.3%) | 183 (49.9%) | 97 (26.4%) |  | | YES | 8 (2.2%) | 13 (3.5%) | 10 (2.7%) |  | | Systolic blood pressure(mmHg) | 134.78 ± 23.17 | 136.38 ± 22.045 | 134.02 ± 19.672 | 0.639 | | Diastolic blood pressure （mmHg) | 80 (75, 90.25) | 83 (75, 91) | 80 (71, 88) | 0.122 | | Pulse (beats/minute) | 74 (65, 80.5) | 76 (67, 86.25) | 75 (68, 83) | 0.29 | | Sleep Duration(h) | 5 (5, 5) | 7 (6, 8) | 9 (9, 10) | <0.001 | | Gensini score, n (%) |  |  |  | < 0.001 | | ≤34 | 4 (1.1%) | 139 (37.9%) | 41 (11.2%) |  | | >34 | 60 (16.3%) | 57 (15.5%) | 66 (18%) |  | | Total cholesterol（mmol/l） | 4.34 (3.57, 5.215) | 4.22 (3.545, 4.79) | 4.365 (3.4775, 4.9075) | 0.641 | | Triglyceride（mmol/l） | 1.275 (0.95, 1.805) | 1.31 (0.97, 1.865) | 1.465 (1.0825, 2.1325) | 0.116 | | High-density lipoprotein cholesterol（mmol/l） | 1.02 (0.87, 1.175) | 1.05 (0.9, 1.19) | 1.03 (0.91, 1.2275) | 0.547 | | Low-density lipoprotein cholesterol（mmol/l） | 2.46 (1.795, 2.955) | 2.23 (1.75, 2.82) | 2.38 (1.73, 2.8875) | 0.341 | | Glucose（mmol/l） | 7 (5.6, 8.85) | 5.8 (5, 6.7) | 6.3 (5.2, 8.2) | <0.001 | | | --- | --- | --- | --- | --- | --- | --- | --- | --- | --- | --- | --- | --- | --- | --- | --- | --- | --- | --- | --- | --- | --- | --- | --- | --- | --- | --- | --- | --- | --- | --- | --- | --- | --- | --- | --- | --- | --- | --- | --- | --- | --- | --- | --- | --- | --- | --- | --- | --- | --- | --- | --- | --- | --- | --- | --- | --- | --- | --- | --- | --- | --- | --- | --- | --- | --- | --- | --- | --- | --- | --- | --- | --- | --- | --- | --- | --- | --- | --- | --- | --- | --- | --- | --- | --- | --- | --- | --- | --- | --- | --- | --- | --- | --- | --- | --- | --- | --- | --- | --- | --- | --- | --- | --- | --- | --- | --- | --- | --- | --- | --- | --- | --- | --- | --- | --- | --- | --- | --- | --- | --- | --- | --- | --- | --- | --- | --- | --- | --- | --- | --- | --- | --- | --- | --- | --- | --- | --- | --- | --- | --- | --- | --- | --- | --- | --- | |
| --- | --- | --- | --- | --- | --- | --- | --- | --- | --- | --- | --- | --- | --- | --- | --- | --- | --- | --- | --- | --- | --- | --- | --- | --- | --- | --- | --- | --- | --- | --- | --- | --- | --- | --- | --- | --- | --- | --- | --- | --- | --- | --- | --- | --- | --- | --- | --- | --- | --- | --- | --- | --- | --- | --- | --- | --- | --- | --- | --- | --- | --- | --- | --- | --- | --- | --- | --- | --- | --- | --- | --- | --- | --- | --- | --- | --- | --- | --- | --- | --- | --- | --- | --- | --- | --- | --- | --- | --- | --- | --- | --- | --- | --- | --- | --- | --- | --- | --- | --- | --- | --- | --- | --- | --- | --- | --- | --- | --- | --- | --- | --- | --- | --- | --- | --- | --- | --- | --- | --- | --- | --- | --- | --- | --- | --- | --- | --- | --- | --- | --- | --- | --- | --- | --- | --- | --- | --- | --- | --- | --- | --- | --- | --- | --- | --- | --- |

Table 2


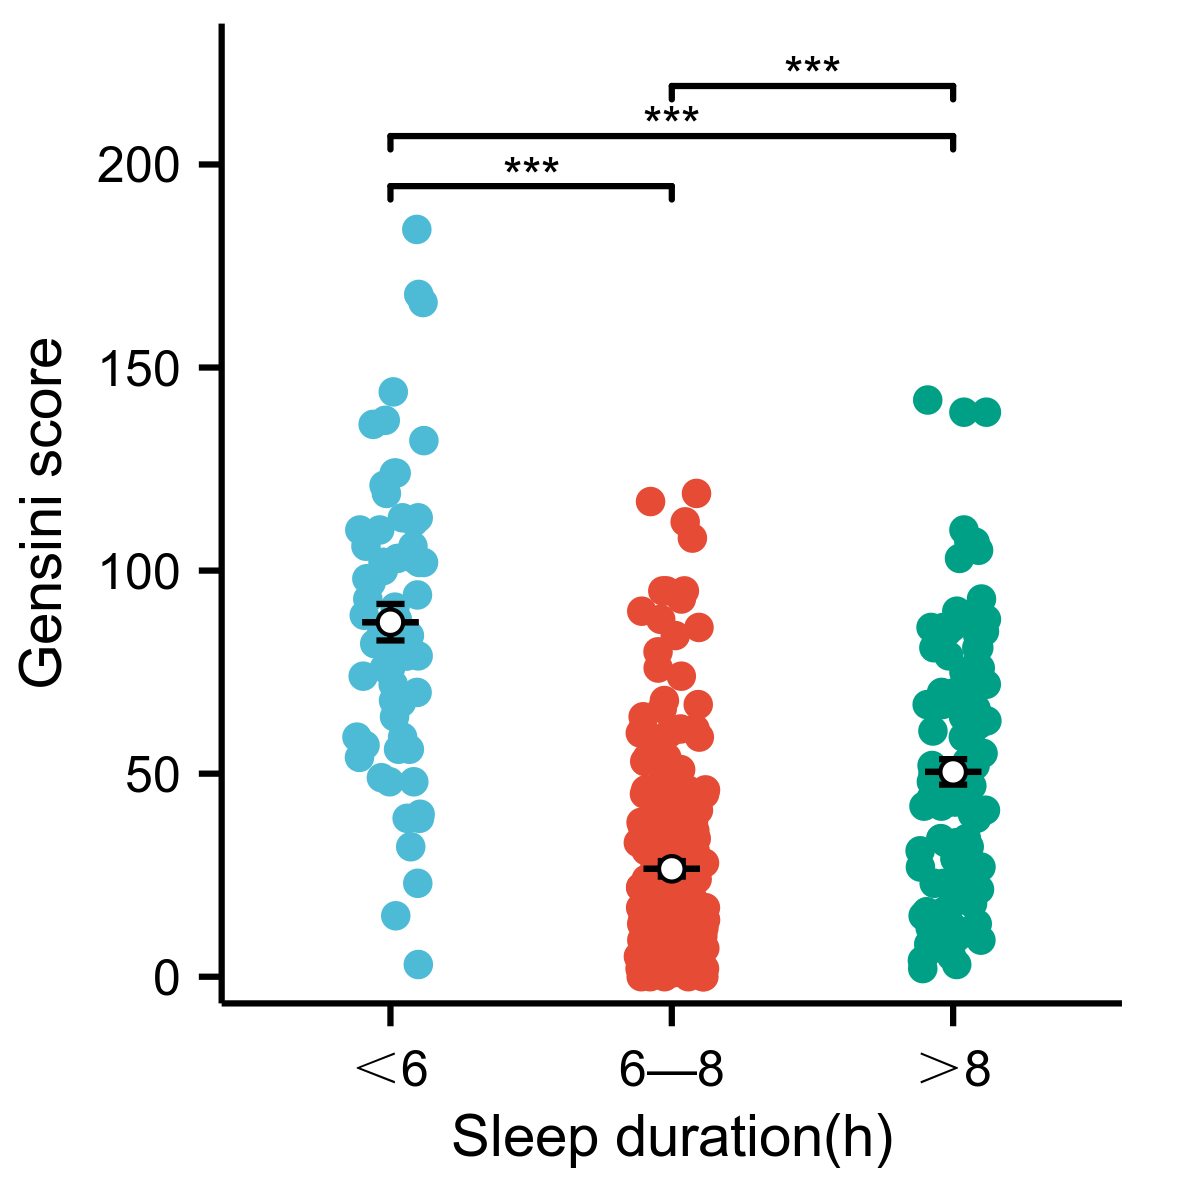


***P<0.001

Table 3 Logistic Regreesion

| Characteristics | Total(N) | Univariate analysis | | Multivariate analysis | |
| --- | --- | --- | --- | --- | --- |
| Odds Ratio (95% CI) | P value | Odds Ratio (95% CI) | P value |
| SEX | 367 |  |  |  |  |
| Female | 125 | Reference |  | Reference |  |
| Male | 242 | 2.759 (1.758 – 4.329) | **< 0.001** | 4.388 (1.971 – 9.767) | **< 0.001** |
| AGE | 367 | 1.004 (0.987 – 1.021) | 0.686 |  |  |
| ID | 367 | 1.000 (1.000 – 1.000) | 0.139 |  |  |
| HEIGHT | 367 | 1.026 (0.999 – 1.054) | 0.057 | 0.962 (0.916 – 1.011) | 0.125 |
| WEIGHT | 367 | 1.019 (1.001 – 1.038) | **0.040** | 1.006 (0.978 – 1.034) | 0.688 |
| Empolyment | 367 | 1.084 (0.921 – 1.276) | 0.332 |  |  |
| Smoking | 367 |  |  |  |  |
| NO | 249 | Reference |  | Reference |  |
| YES,10-20pieces/day | 88 | 1.630 (0.996 – 2.667) | 0.052 | 0.778 (0.394 – 1.536) | 0.469 |
| YES,<10pieces/day | 12 | 0.564 (0.166 – 1.922) | 0.360 | 0.227 (0.045 – 1.137) | 0.071 |
| YES,>20pieces/day | 18 | 1.410 (0.539 – 3.692) | 0.484 | 0.776 (0.245 – 2.461) | 0.667 |
| Drinking | 367 |  |  |  |  |
| NO | 336 | Reference |  |  |  |
| YES | 31 | 1.435 (0.681 – 3.022) | 0.342 |  |  |
| SBP | 367 | 0.988 (0.979 – 0.998) | **0.019** | 0.990 (0.977-1.002) | 0.112 |
| DBP | 367 | 0.986 (0.970 – 1.003) | 0.105 |  |  |
| pluse | 367 | 0.999 (0.985 – 1.012) | 0.856 |  |  |
| Sleep duration | 367 |  |  |  |  |
| 6-8hours | 196 | Reference |  | Reference |  |
| <6hours | 64 | 36.579 (12.698 – 105.372) | **< 0.001** | 30.183 (10.066 – 90.505) | **< 0.001** |
| >8hours | 107 | 3.926 (2.388 – 6.452) | **< 0.001** | 3.784 (2.180 – 6.568) | **< 0.001** |
| CHOL | 360 | 1.114 (0.912 – 1.362) | 0.291 |  |  |
| TG | 359 | 1.089 (0.918 – 1.292) | 0.330 |  |  |
| HDL.C | 360 | 0.315 (0.139 – 0.711) | **0.005** | 0.292 (0.098 – 0.869) | **0.027** |
| LDL.C | 360 | 1.325 (1.018 – 1.725) | **0.036** | 1.510 (1.075 – 2.121) | **0.017** |
| Glucose | 362 | 1.240 (1.123 – 1.370) | **< 0.001** | 1.182 (1.060 – 1.319) | **0.003** |
